# Supplementary material
Source: PubMed Central journal article supplement (PMC3409284)
Supplement: 12_017_Martinez-Martinez.Suppl.pdf [file 12_017_Martinez-Martinez.Suppl.pdf]

Supplemental Data

# The Infective Polymerization of Conformationally Unstable Antithrombin Mutants May Play a Role in the Clinical Severity of Antithrombin Deficiency

Irene Martínez-Martínez, José Navarro-Fernández, Sonia Águila, Antonia Miñano, Nataliya Bohdan, María Eugenia de la Morena-Barrio, Adriana Ordóñez, Constantino Martínez, Vicente Vicente, and Javier Corral

Online address: <http://www.molmed.org>

The Feinstein Institute for Medical Research 

**Supplementary Table S1.** Plasma anti-FXa activity, antigen levels of antithrombin and clinical features of patients with antithrombin deficiency included in this study.

| Mutation | Carriers | Antigen* % | Anti-FXa* % | Family history of thrombosis | Thrombosis     | Age of first event |
|----------|----------|------------|-------------|------------------------------|----------------|--------------------|
| Δ393     | 4        | 86         | 52          | Yes                          | AMI/AMI/PE     | 39/39/30           |
| Δ393     | 4        | 98         | 58          | No                           | DVT            | 17                 |
| R393H    | 4        | 80         | 50          | Yes                          | CVD/DVT        | 61/0               |
| R393C    | 2        | 89         | 51          | Yes                          | DVT/DVT        | 57/27              |
| M338T    | 6        | 71         | 61          | Yes                          | PE/DVT/DVT/DVT | 17/20/25/36        |
| F239S    | 3        | 48         | 39          | Yes                          | DVT/DVT/DVT    | 19/19/27           |

AMI: Acute myocardial infarction; PE: Pulmonary Embolism; CVD: Ischemic Cerebrovascular Disease; DVT: Deep Venous Thrombosis

\* Mean of the values observed in carriers of the family.

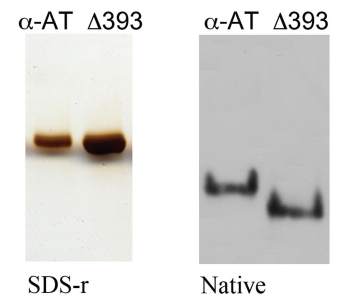

**Supplementary Figure S1.** Electrophoretic mobility of antithrombin London. A) SDS under reducing conditions and silver staining of purified α-antithrombin and antithrombin London (Δ393). B) Non-denaturing electrophoresis and identification by western blot of purified α-antithrombin and antithrombin London (Δ393). Lanes were loaded with 150 ng protein.

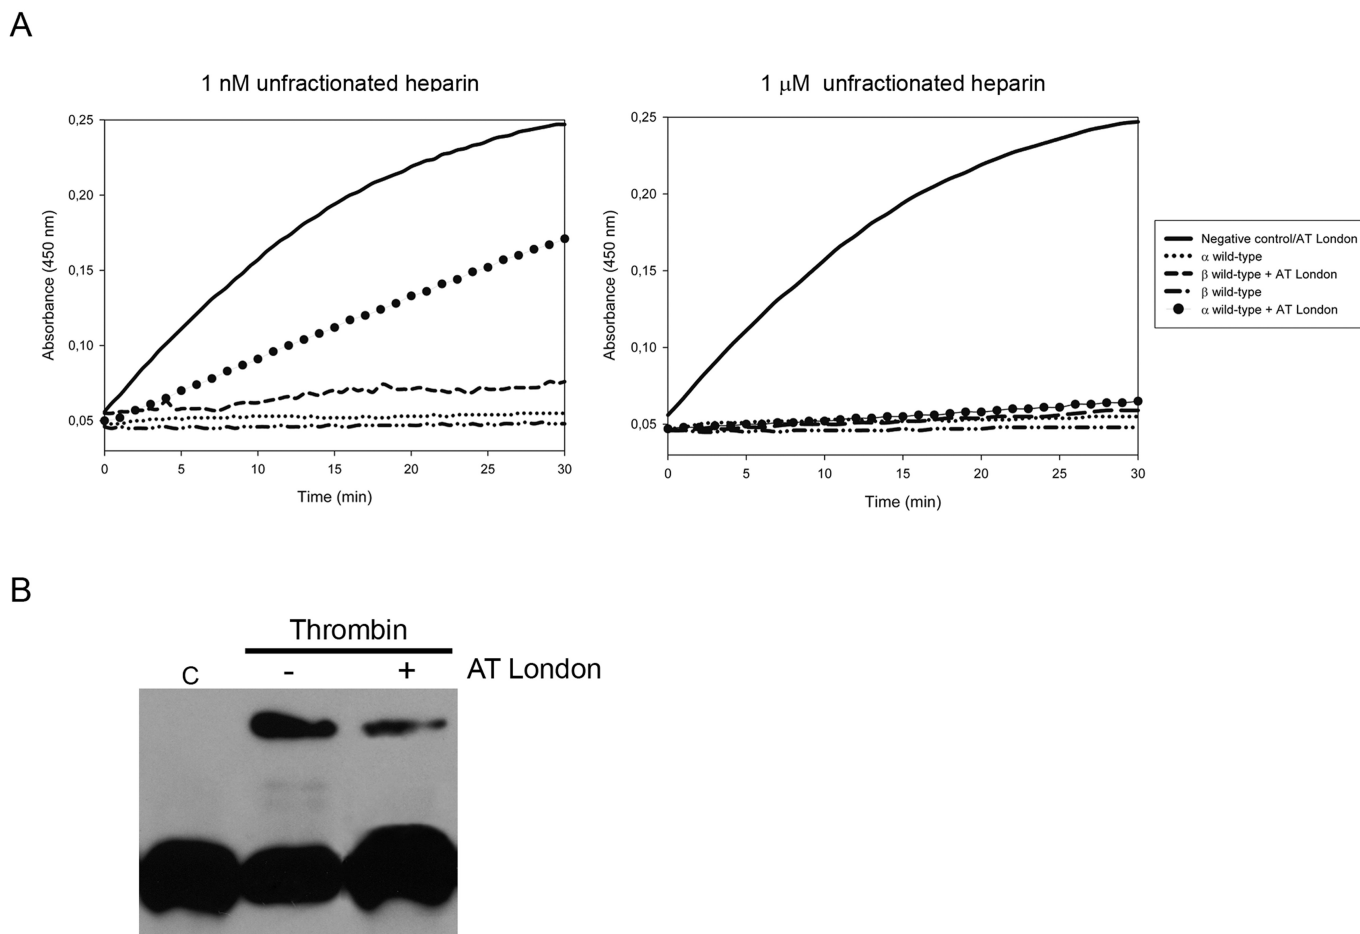

**Supplementary Figure S2.** Loss of inhibitory function and prothrombotic gain of function associated with antithrombin Δ393. A) Time course inhibition of thrombin by antithrombin evaluated by a chromogenic method in a continuous method in the presence of two different amounts of unfractionated heparin. Antithrombin concentration was 10-fold higher than thrombin to assess pseudo-first order conditions. B) Thrombin-antithrombin complexes detected by SDS-PAGE and western blot. The formation of thrombin-antithrombin complex was evaluated by incubation of 150 ng α-antithrombin with 0.25 U thrombin and incubated at 37 °C.

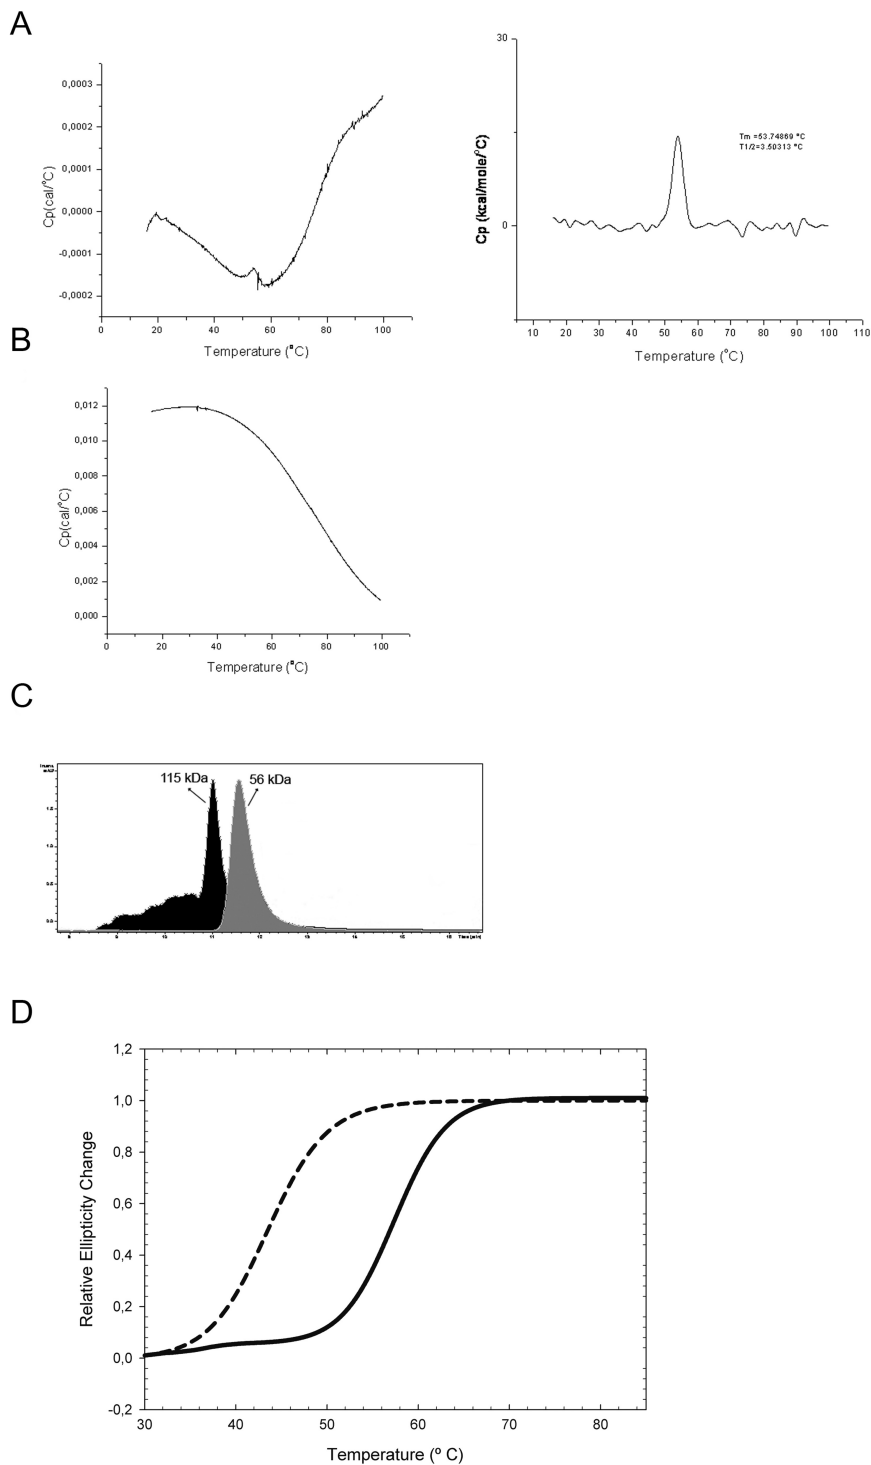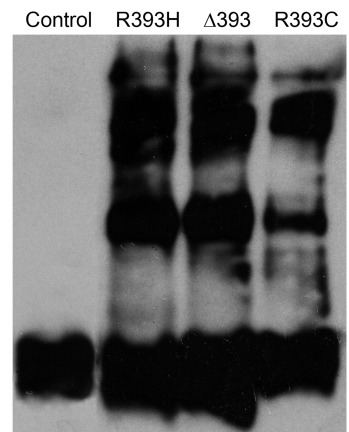

**Supplementary Figure S4.** Immunostaining of the same membrane shown in figure 2C: 2.5  $\mu\text{M}$   $^{125}\text{I}$ -radiolabeled wild type antithrombin added to 1  $\mu\text{L}$  control plasma and 1  $\mu\text{L}$  plasma of carriers of P1 mutants heated at 42°C up to 3 d. Samples were run in native gels.

**Supplementary Figure S3.** Conformational instability of  $\Delta\text{R393}$  antithrombin (Antithrombin London). A) Plot obtained by differential scanning calorimetry (DSC) of wild type antithrombin (left) and melting temperature calculated after data fitting (right). B) Plot obtained by DSC of antithrombin London where no thermal transition was detected. C) Gel filtration chromatography of London (black) and wild type (grey) antithrombins previous to DSC measurements. D) Thermal stability of antithrombin London (dashed line) and wild type (continuous line) measured by changes in circular dichroism at 222 nm.
